# Supplementary material for: How do the characteristics of a meal influence consumer preferences: a systematic literature review of studies using stated choice methods
Source: Research Square preprint supplement (doi:10.21203/rs.3.rs-7714370/v1), 2025-10-16
Supplement: Supplementary file 1 [file 6b7aa3e3f8b2c73766bba016.docx]

**How do the characteristics of a meal influence consumer preferences: a systematic literature review of studies using stated choice methods**

N. Afentou1, L. Fu1, E. Frew1, I. Pokhilenko1*

1Centre for Economics of Obesity, Department of Applied Health Sciences, University of Birmingham, Birmingham, UK

*Corresponding author: [i.pokhilenko@bham.ac.uk](mailto:i.pokhilenko@bham.ac.uk), University of Birmingham, Birmingham, B15 2TT, United Kingdom

## **Appendix 1. Search strategy**

Summary of searches on 06/04/2023:

| **Database** | **Hits** | **After de-duplication** |
| --- | --- | --- |
| Medline | 2,287 | 2,260 |
| Embase | 654 | 105 |
| PsycINFO | 2,290 | 1,991 |
| Web of Science | 2,964 | 947 |
| Scopus | 3,593 | 1,359 |
| EconLit | 626 | 159 |
| CINAHL | 739 | 453 |

After de-duplication: 9,621

1. Medline

Ovid MEDLINE(R) ALL <1946 to April 05, 2023>

1 (discrete choice experiment* or discrete choice modeling or discrete choice modelling or discrete choice conjoint experiment or stated preference or part-worth utilities or functional measurement or paired comparisons or pairwise choices or conjoint analysis or conjoint measurement or conjoint studies or conjoint choice experiment* or object scaling or object case or BWS or best-worst or best worst or max dif* or maxdif* or max diff scaling or maxdiff scaling or maximum difference).ab,ti. 9275

2 *"Choice Behavior"/ 18123

3 "DCE".kw. 96

4 "discrete choice experiment".kw. 903

5 1 or 2 or 3 or 4 26781

6 (food or meal* or diet* or product or eat* or consum* or purchas* or nutritio* or snack or portion or dish or plate or beverage or drink or lunch or breakfast or dinner or intake or taste or takeaway or menu).af,ab,ti. 3613361

7 *"Food Preferences"/ 8994

8 "Meals"/ 4837

9 "Taste"/ 25592

10 "food attributes".kw. 6

11 "diet quality".kw. 1592

12 "eating behaviors".kw. 399

13 "eating patterns".kw. 120

14 "food choice".kw. 606

15 6 or 7 or 8 or 9 or 10 or 11 or 12 or 13 or 14 3613361

16 5 and 15 5767

17 limit 16 to (english language and humans and yr="2013 -Current" and journal article) 2287

2. Embase

Embase <1974 to 2023 April 05>

1 (discrete choice experiment* or discrete choice modeling or discrete choice modelling or discrete choice conjoint experiment or stated preference or part-worth utilities or functional measurement or paired comparisons or pairwise choices or conjoint analysis or conjoint measurement or conjoint studies or conjoint choice experiment* or object scaling or object case or BWS or best-worst or best worst or max dif* or maxdif* or max diff scaling or maxdiff scaling or maximum difference).ab,ti. 13035

2 *"discrete choice experiment"/ 145

3 "DCE".kw. 128

4 "discrete choice experiment".kw. 1071

5 1 or 2 or 3 or 4 13182

6 (food or meal* or diet* or product or eat* or consum* or purchas* or nutritio* or snack or portion or dish or plate or beverage or drink or lunch or breakfast or dinner or intake or taste or takeaway or menu).ab,ti. 3257143

7 "meal"/ 21891

8 "taste"/ 25828

9 "Food".kw. 6707

10 "Food attributes".kw. 6

11 "diet quality".kw. 1973

12 "eating behaviors".kw. 499

13 "eating patterns".kw. 206

14 "food choice".kw. 828

15 *"food preference"/ 5738

16 *"meal"/ 4325

17 "taste preference"/ 2532

18 6 or 7 or 8 or 9 or 10 or 11 or 12 or 13 or 14 or 15 or 16 or 17 3265298

19 5 and 18 1711

20 limit 19 to (human and english language and yr="2013 -Current" and (article or article in press) and journal) 654

3. PsycINFO

APA PsycInfo <1967 to April Week 1 2023>

1 (discrete choice experiment* or discrete choice modeling or discrete choice modelling or discrete choice conjoint experiment or stated preference or part-worth utilities or functional measurement or paired comparisons or pairwise choices or conjoint analysis or conjoint measurement or conjoint studies or conjoint choice experiment* or object scaling or object case or BWS or best-worst or best worst or max dif* or maxdif* or max diff scaling or maxdiff scaling or maximum difference).ab,ti. 3518

2 "discrete choice experiment".id. 300

3 "Choice Behavior".mh. 14460

4 *"Choice Behavior"/ 16214

5 1 or 2 or 3 or 4 31499

6 (food or meal* or diet* or product or eat* or consum* or purchas* or nutritio* or snack or portion or dish or plate or beverage or drink or lunch or breakfast or dinner or intake or taste or takeaway or menu).ab,ti. 386494

7 "Food Preferences".mh. 5555

8 "Meals".mh. 611

9 *"Food Intake"/ 12850

10 "Diet".mh. 7394

11 "diet".id. 7267

12 6 or 7 or 8 or 9 or 10 or 11 388417

13 5 and 12 7545

14 limit 13 to (human and english language and ("0100 journal" or "0110 peer-reviewed journal") and journal article and yr="2013 -Current") 2290

4. Web of Science

(TI=("discrete choice experiment*" OR "discrete choice modelling" OR "discrete choice modelling" OR "discrete choice conjoint experiment" OR "stated preference" OR "part-worth utilities" OR "functional measurement" OR "paired comparisons" OR "pairwise choices" OR "conjoint analysis" OR "conjoint measurement" OR "conjoint studies" OR "conjoint choice experiment*" OR "object scaling" OR "object case" OR "BWS" OR "best-worst" OR "best worst" OR "max dif*" OR "maxdif*" OR "max diff scaling" OR "maxdiff scaling" OR "maximum difference") OR AB=("discrete choice experiment*" OR "discrete choice modelling" OR "discrete choice modelling" OR "discrete choice conjoint experiment" OR "stated preference" OR "part-worth utilities" OR "functional measurement" OR "paired comparisons" OR "pairwise choices" OR "conjoint analysis" OR "conjoint measurement" OR "conjoint studies" OR "conjoint choice experiment*" OR "object scaling" OR "object case" OR "BWS" OR "best-worst" OR "best worst" OR "max dif*" OR "maxdif*" OR "max diff scaling" OR "maxdiff scaling" OR "maximum difference")) AND (TI=(food or meal* or diet* or product or eat* or consum* or purchas* or nutritio* or snack or portion or dish or plate or beverage or drink or lunch or breakfast or dinner or intake or taste or takeaway or menu) OR AB=(food or meal* or diet* or product or eat* or consum* or purchas* or nutritio* or snack or portion or dish or plate or beverage or drink or lunch or breakfast or dinner or intake or taste or takeaway or menu))

Filters: 2013-2023, English, Article

Result: 2,964 hits

5. Scopus

((TITLE(("discrete choice experiment*" OR "discrete choice modelling" OR "discrete choice modelling" OR "discrete choice conjoint experiment" OR "stated preference" OR "part-worth utilities" OR "functional measurement" OR "paired comparisons" OR "pairwise choices" OR "conjoint analysis" OR "conjoint measurement" OR "conjoint studies" OR "conjoint choice experiment*" OR "object scaling" OR "object case" OR "BWS" OR "best-worst" OR "best worst" OR "max dif*" OR "maxdif*" OR "max diff scaling" OR "maxdiff scaling" OR "maximum difference")) OR ABS(("discrete choice experiment*" OR "discrete choice modelling" OR "discrete choice modelling" OR "discrete choice conjoint experiment" OR "stated preference" OR "part-worth utilities" OR "functional measurement" OR "paired comparisons" OR "pairwise choices" OR "conjoint analysis" OR "conjoint measurement" OR "conjoint studies" OR "conjoint choice experiment*" OR "object scaling" OR "object case" OR "BWS" OR "best-worst" OR "best worst" OR "max dif*" OR "maxdif*" OR "max diff scaling" OR "maxdiff scaling" OR "maximum difference")))) AND ((TITLE(food or meal* or diet* or product or eat* or consum* or purchas* or nutritio* or snack or portion or dish or plate or beverage or drink or lunch or breakfast or dinner or intake or taste or takeaway or menu) OR ABS(food or meal* or diet* or product or eat* or consum* or purchas* or nutritio* or snack or portion or dish or plate or beverage or drink or lunch or breakfast or dinner or intake or taste or takeaway or menu))) AND ( LIMIT-TO ( DOCTYPE,"ar" ) ) AND ( LIMIT-TO ( PUBYEAR,2023) OR LIMIT-TO ( PUBYEAR,2022) OR LIMIT-TO ( PUBYEAR,2021) OR LIMIT-TO ( PUBYEAR,2020) OR LIMIT-TO ( PUBYEAR,2019) OR LIMIT-TO ( PUBYEAR,2018) OR LIMIT-TO ( PUBYEAR,2017) OR LIMIT-TO ( PUBYEAR,2016) OR LIMIT-TO ( PUBYEAR,2015) OR LIMIT-TO ( PUBYEAR,2014) OR LIMIT-TO ( PUBYEAR,2013) ) AND ( LIMIT-TO ( LANGUAGE,"English" ) ) AND ( LIMIT-TO ( SRCTYPE,"j" ) )

Results: 3,593

Filters: English, 2013-2023, Article (publication type), Journal (source)

6. EconLit (none of the 3 key papers are indexed)

(TI ( discrete choice experiment* or discrete choice modeling or discrete choice modelling or discrete choice conjoint experiment or stated preference or part-worth utilities or functional measurement or paired comparisons or pairwise choices or conjoint analysis or conjoint measurement or conjoint studies or conjoint choice experiment* or object scaling or object case or BWS or best-worst or best worst or max dif* or maxdif* or max diff scaling OR maxdiff scaling or maximum difference ) OR AB ( discrete choice experiment* or discrete choice modeling or discrete choice modelling or discrete choice conjoint experiment or stated preference or part-worth utilities or functional measurement or paired comparisons or pairwise choices or conjoint analysis or conjoint measurement or conjoint studies or conjoint choice experiment* or object scaling or object case or BWS or best-worst or best worst or max dif* or maxdif* or max diff scaling OR maxdiff scaling or maximum difference )) AND (TI ( food or meal* or diet* or product or eat* or consum* or purchas* or nutritio* or snack or portion or dish or plate or beverage or drink or lunch or breakfast or dinner or intake or taste or takeaway or menu ) OR AB ( food or meal* or diet* or product or eat* or consum* or purchas* or nutritio* or snack or portion or dish or plate or beverage or drink or lunch or breakfast or dinner or intake or taste or takeaway or menu ))

Hits: 626

Filters: English, 2013-2023, Academic journals

7. CINAHL

S10

S1 AND S7

Limiters - Publication Year: 2013-2023

Expanders - Apply equivalent subjects

Narrow by Language: - english

Search modes - Boolean/Phrase

View Results (759)

View Details

Edit

S9

S1 AND S7

Limiters - Publication Year: 2013-2023

Expanders - Apply equivalent subjects

Search modes - Boolean/Phrase

View Results (766)

View Details

Edit

S8

S1 AND S7

Expanders - Apply equivalent subjects

Search modes - Boolean/Phrase

View Results (1,198)

View Details

Edit

S7

S2 OR S3 OR S4 OR S5 OR S6

Expanders - Apply equivalent subjects

Search modes - Boolean/Phrase

View Results (643,691)

View Details

Edit

S6

MM "Meals"

Expanders - Apply equivalent subjects

Search modes - Boolean/Phrase

View Results (2,094)

View Details

Edit

S5

MM "Diet"

Expanders - Apply equivalent subjects

Search modes - Boolean/Phrase

View Results (35,611)

View Details

Edit

S4

MM "Food preferences"

Expanders - Apply equivalent subjects

Search modes - Boolean/Phrase

View Results (4,161)

View Details

Edit

S3

MH "Taste"

Expanders - Apply equivalent subjects

Search modes - Boolean/Phrase

View Results (4,051)

View Details

Edit

S2

TI ( food or meal* or diet* or product or eat* or consum* or purchas* or nutritio* or snack or portion or dish or plate or beverage or drink or lunch or breakfast or dinner or intake or taste or takeaway or menu ) OR AB ( food or meal* or diet* or product or eat* or consum* or purchas* or nutritio* or snack or portion or dish or plate or beverage or drink or lunch or breakfast or dinner or intake or taste or takeaway or menu )

Expanders - Apply equivalent subjects

Search modes - Boolean/Phrase

View Results (637,610)

View Details

Edit

S1

TI ( discrete choice experiment* or discrete choice modeling or discrete choice modelling or discrete choice conjoint experiment or stated preference or part-worth utilities or functional measurement or paired comparisons or pairwise choices or conjoint analysis or conjoint measurement or conjoint studies or conjoint choice experiment* or object scaling or object case or BWS or best-worst or best worst or max dif* or maxdif* or max diff scaling OR maxdiff scaling or maximum difference ) OR AB ( ...

Expanders - Apply equivalent subjects

Search modes - Boolean/Phrase

View Results (10,075)

View Details
