# Supplementary material for: How do the characteristics of a meal influence consumer preferences: a systematic literature review of studies using stated choice methods
Source: Research Square preprint supplement (doi:10.21203/rs.3.rs-7714370/v1), 2025-10-16
Supplement: Supplementary file 2 [file ec4fb8bb4fa706d8bcfc1581.xlsx]

## Sheet: Title page
How do the characteristics of a meal influence consumer preferences: a systematic literature review of studies using stated choice methods
N. Afentou, L. Fu, E. Frew, I. Pokhilenko*
Centre for Economics of Obesity, Department of Applied Health Sciences, University of Birmingham, Birmingham, UK
*Corresponding author: i.pokhilenko@bham.ac.uk, University of Birmingham, Birmingham, B15 2TT, United Kingdom

## Sheet: Study characteristics
General study characteristics							Attributes and levels information					Methodological characteristics
Author (Year)	Title	Country	Study design	Meal/product description	Setting	Population	Number of attributes	Attributes covered	Explanation	Levels for each attribute (separate row for each attribute)	Ranking/relative importance	Source where the attributes/levels were derived from	Number of alternatives in a choice task (excluding opt-outs)	Opt-out or status quo option included (Y/N)	Number of choice tasks per respondent	Mode of survey administration	Design type	Design software	Blocking used (Y/N)	Estimation procedures (statistical model(s))	Software for statistical analysis	Was preference heterogeneity investigated (Y/N)	Methods for investigating preference heterogeneity	Qualitative methods (Y/N)	Qualitative methods used for	Type of qualitative method(s) used
Arsic et al (2019)	Menu evaluation based on rough MAIRCA and BW methods	Serbia	Best-worst method	University restaurant menu	University	15 experts with years of work experience in technological process of menu dishes preparation (restaurant staff in charge of storing, preparation and distribution of food in a restaurant in conditions of normal and unforeseen circumstances); 35 restaurant users	9	Time needed for preparation	The duration of technological process	Not reported	Unclear, or N/A	Expert opinion	Not reported	N	Not reported	Not reported	Not reported	Not reported	N	Best-worst method - multi-attributive ideal real comparative analysis (BWM-MAIRCA)	Lingo	N	N/a	Y	Obtaining model values	Survey
								Technical, technological, and organizational requirements for storage of meal components	Space, appliances, and storage facilities
								Technical, technological and organizational requirements for meal preparation	Space, machines, appliances, accessories, recipes, qualifications of people
								Price	Cost of fresh foods
								Energy value	Caloric value of a meal
								Digestibility	A subjective feeling in the body after consuming a meal
								Sensory properties	Appearance, smell, taste, texture
								Elan for work	Mental and physical work after the meal
								The possibility of preparation in unforeseen circumstances	In case of technical, technological and organizational requirements dysfunction
Buttorff et al (2015)	Evaluating consumer preferences for healthy eating from Community Kitchens in low-income urban areas: A discrete choice experiment of Comedores Populares in Peru	Peru	Best-worst discrete choice experiment	Meals prepared in community kitchens	Community kitchens, government supported food vendors serving low-income Peruvians	432 adult (>18years) community kitchen visitors	6	Price		1.5; 3; 6 nuevos soles (Peruvian currency)	1	Prior qualitative study	3	Y	8	In-person	Full factorial design	SAS	Y	Conditional and rank-ordered logit models	Stata	Y	Subgroup analysis	Y	Development of attributes and levels	Interviews
								Salad		None, medium, large	2
								Soup		None, medium, large	3
								Sides (beans and rice)		Small, medium, large	6
								Meat		None, one portion, two portions	4
								Fruit		None, one fruit, two fruits	5
Chaffee et al (2022)	Identifying elements of a ready-to-eat meal desired by older adults	Canada, USA	Rating-based conjoint analysis	Home delivered ready to eat meals	Household	285 participants over 60 living independently	4	Protein source		Chicken, fish, alternative, egg	1	Common characteristics of market-available frozen meals, antihypertensive dietary recommendations	1	N	24	Online	Half factorial design	Not reported	N	Ordinary least squares regression	XLSTAT	Y	Subgroup analysis	N	N/a	N/a
								Taste theme		Meditteranean, Asian, Latin	2
								Fiber source		Grains, vegetables	4
								Spice presence		Spicy, not spicy	3
Corazza et a (2021)	Promoting healthy eating habits among youth according to their preferences: Indications from a discrete choice experiment in Tuscany	Tuscany (Italy)	Discrete choice experiment	Breakfast foods	Purchased food	4669 16–17 year-old teenagers residing in Tuscany (Italy)	3	Quality of food		Low-fat yoghurt, chocolate cornflakes, sweet snacks	1	Literature	2	N	3	Online	Full factorial d-efficient design	Stata	Y	Conditional logit	Stata	Y	Interaction effects	N	N/a	N/a
								Packaging		Natural, bright and colorful	3
								Claim		Healthy, multivit, tasty	2
de Guzman et al (2020)	Examining the role of depression in the Filipino elderly's food preferences in prison setting: data from conjoint analysis and SEM	Philippines	Conjoint analysis	Menus provided in a prison setting	Prisons	160 Filipino prisoners (109 from a city jail and 51 from a provincial jail) of 60 years old and above and conversant	5	Food		Sweet, salty, sour, umami	1	Not reported	16	N	1	In-person	Balanced incomplete block design	Not reported	N	Pearson's r; Kendall's Tau; structural equation modelling	Statistical Package for Social Sciences 24	N	N/a	N	N/a	N/a
								Food texture		Soft, hard, chewy	2
								Color variation		With color variation, without color variation	4
								Portion size		Small portion size, big portion size	5
								Dietary diversity		2/3/4 food groups	3
Ernawati et al (2019)	CONSUMER PREFERENCES FOR INDONESIAN FOOD	Indonesia	Conjoint analysis	Meals from different cuisines	Out of home eating	Consumers in Indonesia	5	Food's origin		Indonesian, Western, Chinese, Japanese	1	Literature, prior research and discussions	16	N	16	In-person	Orthogonal design	SPSS	N	Not reported	SPSS	Y	ANOVA	N	N/a	N/a
								Freshness		Fresh (fresh from the oven)/not fresh	5
								Taste		Sweet, crisp, spicy/hot	2
								Price		Cheap, average cost, expensive	3
								How food is served		With wait-staff, self-service	4
Iannuzzi et al (2019)	The willingness to consume insect-based food: an empirical research on Italian consumers	Italy	Conjoint analysis	Pizza	Catering market	Random sample of 587 Italian potential consumers over 18	7	Flour		00, gluten free, cricket	N/a, estimated preferences for indivudal alternatives of interest rather than attributes and levels	Based on the research question and attributes of interest	2	Y	15	Online	Not reported	Not reported	N	Not reported	SPSS	N	N/a	N	N/a	N/a
								Mozzarella cheese		Protected Designation of Origin mozzarella cheese
								Tomato		Protected Designation of Origin tomato
								Protein content		Calculated based on the ingredient list
								Carbohydrate content		Calculated based on the ingredient list
								Fat content		Calculated based on the ingredient list
								Additional ingredient (spirulina)		Yes, no
Jeffries et al (2013)	Preferences for healthy carryout meals in low-income neighborhoods of Baltimore city	USA	Conjoint analysis	Healthy carryout meals	Out of home eating	58 adult carryout customers	5	Entrée		Grilled chicken sandwich, turkey club sandwich	2	Prior research, implementation feasibility and stakeholder consultation	2	N	10	In-person	Random design with complete enumeration	Sawtooth	Y	Pearson-s chi square, logistic regression	Stata	N	N/a	N	N/a	N/a
								Beverage		Diet soda, water	1
								Side dish		Green salad, fruit (watermelon)	These are not significant
								Price		5; 7.50 USD
								Label		Fresh leaf logo; Healthy!
Kamphuis et al (2015)	Factors affecting food choices of older adults from high and low socioeconomic groups: A discrete choice experiment	Netherlands	Discrete choice experiment	Dinner	Household	399 older adult participants	5	Taste		Very good; good; sufficient	2	Literature, cost considerations	2	Y	12	Face-to-face interviews	D-efficient design	Not reported	Y	Multinomial logit model	Nlogit	Y	Interaction effects	Y	Pilot of attribute levels	Think-aloud interviews
								Healthy		Healthy; neutral; unhealthy	1
								Price		2; 4; 6; 8 EUR per person	3
								Preparation time		0 minutes (in case of a ready meal, or take-away food); 15 minutes; 30 minutes; 45 minutes	5
								Travel time from home to shop		5 minutes; 10 minutes; 15 minutes; 20 minutes	4
Kershaw et al (2019)	Assessment of the influence of food attributes on meal choice selection by socioeconomic status and race/ethnicity among women living in Chicago, USA: A discrete choice experiment	USA	Discrete choice experiment	Generic meal	Household	228 women aged 18–44 years from four racially, ethnically, and socioeconomically diverse Chicago neighborhoods	5	Taste		OK; Good; Very good	2	Literature	4	Y	10	In-person	D-efficient design	SAS	N	Mixed logit model	Nlogit	Y	Subgroup analysis (race/ethnicity), SES	N	N/a	N/a
								Healthiness		Neutral; Healthy; Unhealthy	1
								Price		2; 4; 6; 8 USD per person	4
								Preparation time		0; 15; 30; 45 minutes	3
								Travel time from home to the food store		5; 10; 20; 30 minutes	5
Kitunen et al (2022)	Segments of military ration pack eaters: Choice preferences among groups	Australia	Best-worst scaling	Military ration pack	Military	300 military personnel	21	Main meal; bread; jam biscuit; tuna; jerky bar; chocolate candy; fruit bar; chocolate bar; instant potato; cracker biscuit; fruit in syrup; cereal bar; cheese; muesli; sports drink; noodles; soft candy; hard candy; spreads; soup; chocolate drink			Attributes from most to least chosen: Jam biscuit; Tuna; Bread; Main meal; Noodles; Chocolate candy; Instant potato; Muesli; Fruit in syrup; Fruit bar; Cheese; Cereal bar; Jerky bar; Chocolate bar; Sports drink; Cracker biscuit; Chocolate drink; Spreads; Soup; Soft candy; Hard candy	Products from a recent Australian combat ration pack	5	N	21	Online	Balanced incomplete block design	Not reported	N	Not reported	SPSS	Y	Two-step cluster analysis	N	N/a	N/a
Livingstone et al (2021)	Understanding Meal Choices in Young Adults and Interactions with Demographics, Diet Quality, and Health Behaviors: A Discrete Choice Experiment	Australia	Discrete choice experiment	Typical weekday meal	Household	557 adults (18-30 y/o) living in Australia	5	Nutrition content		Low; adequate; optimal	1	Literature, previous pilot DCE	3	N	12	Online	Bayesian D-efficient design developed using 2 Gaussian draws and the modified Federov algorithm	Ngene	Y	Conditional logit model	Stata	Y	Subgroup analysis	Y	Exploring the feasibility of DCE, perceptions and better understanding the results	Qualitative questions included in the main DCE survey
								Cost		5; 10; 15 per person	2
								Quality		Low; moderate; high	3
								Taste		Sufficient; good; very good	4
								Preparation time		5; 15; 30 minutes	5
Livingstone et al (2020)	Ranking of meal preferences and interactions with demographic characteristics: a discrete choice experiment in young adults	Australia	Discrete choice experiment	Typical weekday meal	Household	92 young adults (aged 18–30 years)	5	Preparation time of a meal		5; 15; 30 minutes	5	Literature	4	N	12	Online	Balanced overlap design	Sawtooth	N	Conditional logit model	R and Stata	Y	Interaction effects	Y	Pilot of attributes and levels, understanding DCE perceptions and results	Not reported for pilot; qualitative questions included in the survey
								Nutrition content of a meal		Low; adequate; optimal	1
								Cost of a meal		5; 10; 15 per person	2
								Taste of a meal		Sufficient; good; very good	3
								Familiarity of a meal		Not very familiar; somewhat familiar; very familiar	4
Loureiro et al (2016)	The incidence of calorie labeling on fast food choices: A comparison between stated preferences and actual choices	Spain	Best-worst scaling	Fast food	University campus	174 adults (majority of university students)	7	Single chicken burger; single bacon burger; single beef burger; double beef burger; double bacon burger; double chicken burger; salad			Stated preferences (from most to least preferred): single chicken burger, single beef burger, double chicken burger, salad, double bacon burger, single bacon burger, double beef burger Actual purchase: double bacon burger, single chicken burger, single bacon burger, single beef burger, double chicken burger, double beef burger, salad	Menu of a fast food chain	3	N	7	In-person	Balanced incomplete block design	Not reported	N	Multinomial logistic model	Stata	N	N/a	N	N/a	N/a
Marchini et al (2023)	Food values: How they relate to legality	Italy	Best-worst scaling	Food	University	333 students aged over 18	7	Naturalness	Limits within which food is produced without the use of additives, chemicals, or modern technology (e.g. low-processed foods)		Share of preference: 22%	Literature	3	N/a	7	Online	Balanced incomplete block design	R	Y	Conditional logit	Stata	N	N/a	N	N/a	N/a
								Price	The price paid for food		0.15
								Safety	Extent to which consumption of food is safe and it will not cause illness (e.g. reliability of producers, security of origin)		0.16
								Nutrition	Nutritional characteristics of food: amount and type of fat, proteins, vitamins, etc		0.11
								Fairness	Limits within which all participants in the value chain receive fair benefits for their work or business (e.g. working conditions, dignified wages)		Not important/omitted
								Environmental impact	Effect of food production on the environment (environmental sustainability of the process)		25% (most important)
								Legality	The respect of the laws during the production and distribution (e.g. supply chain not controlled by organized crime, animal conditions according to the laws)		0.1
McKeown et al (2018)	Independent decision making of adolescents regarding food choice	UK	Conjoint analysis	Menu (breakfast, lunch, snack)	Summer schemes and scripture union youth groups with adolescent members in Northern Ireland	239 adolescents aged 12-18	5	Fruit & vegetables		Poor; Moderate; Good	20.5% (RI)	Current dietary guidelines in the UK	19	Not reported	Not reported	Phase 1: not reported; Phase 2: self-completed (paper); Phase 3: interviews	Fractional factorial	Not reported	Not reported	Correlation analysis	Not reported	N	Not reported	Y	Understanding results/responses	Interviews
								Carbohydrates		Poor; Moderate; Good	0.181
								Dairy		Poor; Moderate; Good	0.175
								Fat & sugar		Poor; Moderate; Good	0.222
								Meat & protein		Poor; Moderate; Good	0.217
Milte et al (2018)	Taste, choice and timing: Investigating resident and carer preferences for meals in aged care homes	Australia	Discrete choice experiment	Meal and dining experience	3 aged care homes in Australia	292 residents or family members of residents living in age care homes	6	Taste		Not very (tasty); satisfactory; excellent	Excellent taste most important (highest coef)	Expert opinion (qualitative study)	2	Not reported	6	Interview administered (phone/face-to-face)	Not reported	Ngene	Y	Multinomial and conditional logit models	Stata	Y	Mixed logit applied in 2 groups	Y	Attribute selection	Interviews
								Degree of choice in serving size		No choice; a little; a lot of choice	Unclear ranking
								Degree of choice in meal provided		No choice; the day before; at the time of serving	Unclear ranking
								Flexibility in mealtimes		Anytime I like; within a 1-2 hour range; at a set time	Unclear ranking
								Visual appeal		Not very (appealing); satisfactory; excellent	Unclear ranking
								Additional cost		Amount (open text)	Unclear ranking
Nguyen et al (2022)	Regulating menu information: What do consumers care and not care about at casual and fine dining restaurants for seafood consumption?	USA	Discrete choice experiment	Fish entrée	Casual and fine dining restaurants	1053 adult respondents (525/fine dining restaurants and 527/casual restaurants) who have eaten at casual or fine dining restaurant in the past 12 months and have consumed seafood in the past	6	Fish species		Salmon; Catfish; Cod; Red snapper; Swai/basa/pangasius;Tilapia; Unknown	20.5% (fine); 21.1% (casual)	Literature	2	Y	12	Online survey	Full factorial	SAS	Y	Mixed logit and random parameter logit models	SAS	Y	Other: Mixed logit	N	N/a	N/a
								Country of origin		Domestic; Imported; Unknown	4.6% (fine); 6.35 (casual)
								Production method		Wild caught; farm-raised; unknown	6%(fine); 4.3%(casual)
								Sustainability certification		Certificated; non-certified	16.4%(fine); 17.6%(casual)
								Sustainability rating		Green; yellow; red; gray; unknown	37.1%(fine); 38.3%(casual)
								Price		Casual – restaurants ↔ Fine Dining – restaurants 1. $12.99/entrée ↔ $20.50/entrée 2. $14.99/entrée ↔ $28.50/entrée 3. $17.99/entrée ↔ $36.50/entrée 4. $20.99/entrée ↔ $43.50/entrée	15.3%(fine); 12.4%(casual)
O'Neill et al (2014)	A question of taste: Recognising the role of latent preferences and attitudes in analysing food choices	Northern Ireland	Stated choice experiment	Home-cooked meal	Household	584 individuals from a random sample of households	4	Calories		Less than 400 calories; Between 400 and 600 calories; Over 600 calories	Unclear	Expert opinion (qualitative study)	3	N	8	Interview administered	Not reported	Ngene	Y	Multinomial and conditional logit models	Ox 6.2	Y	Latent class analysis	Y	Attribute selection	Interviews
								Cooking time		Less than 30 min; Between 31 and 60 min; Over 60 min	Unclear
								Food type	“Food type” was used as a proxy for taste	Asian; Italian; Local	Unclear
								Cost		£5; £10; £15	Unclear
Ong et al (2023)	Consumer preference analysis on the attributes of samgyeopsal Korean cuisine and its market segmentation: Integrating conjoint analysis and K-means clustering	Phillipines	Conjoint analysis	Samgyeopsal meal	Philipino restaurants	1018 Filipino consumers of Samgyeopsal	6	Meat	Main entrée of samgyeopsal	Pork; beef; chicken; seafood	Importance values: 46.3	Literature	Not reported	Not reported	27	Online survey	Not reported	SPSS	Not reported	Not reported	SPSS	Not reported	Not reported	N	N/a	N/a
								Cheese	Cheese can be both a stand-alone dish and an ingredient in cooking.	With cheese; without cheese	33.1
								Style	Style refers to the way the main entrée is being prepared.	Grilled; Hot Pot; Pre-cooked	3.35
								Price		499 PhP; 599 PhP; 699 PhP (Philipino peso)	9.36
								Brand		Sariwon Korea; Soban K-Town Grill; Samgyupsalamat; Romantic Baboy	1.29
								Drinks	Drink paired with meal	Soju/beer; soft drinks; juice	6.6
Panchalingam et al (2023)	Food choice behavior of adolescents under parent-child interaction in the context of US school lunch programs	USA	Discrete choice experiment	School day lunch	Schools with midday meal programs in the U.S	3988 parent-student dyads	4	Entrée		Local or not (2 levels)	unclear	Literature	3	Y	4	Online survey	Full factorial	SAS	Y	Random parameter logit	STATA	Y	Not reported	N	n/a	n/a
								Fruit		Local or not (2 levels)	unclear
								Vegetable		Local or not (2 levels)	unclear
								Price per lunch		$2.80; $3.20; $3.60; $4.00	unclear
Peters et al (2020)	Factors influencing consumer menu-item selection in a restaurant context	Australia	Best-worst scaling	menu item	Casual restaurant (50% of sample)/fine-dining restaurant(other 50% of sample)	1208 Australian individuals who previously visited a casual- or fine-dining restaurant (random sample)	13	Local produce	The origin of the main component of a dish		46.5 (casual); 55.9(fine)	Literature, expert opinion	4	N/a	13	Online survey	Not reported	Not reported	Y	B-W, ANOVA	Not reported	Y	Subgroup analysis	Y	Attribute selection	Focus group
								Price	Price is a combination with the type of the dish, the restaurant itself, the atmosphere, the service		76(casual); 64.3(fine)
								Way a dish is written in menu			64.1(casual); 65.4(fine)
								Healthy option	Individual’s mindfulness towards selecting a dish containing nutritional properties.		53.3(casual); 56.1(fine)
								Method of preparation	How a dish is cooked and served on the plate (i.e. grilled, steamed, battered, etc.)		76.4(casual); 78.8(fine)
								Dish I’ve never tried before	Variety-seeking behavior of an individual		51.5(casual); 66.1(fine)
								Accompaniments	e.g. (salade, vegetables, sauce)		65.3(casual); 68.1(fine)
								Combination of ingredients	Combination of ingredients that complement each other well		100(both)
								Dish that I have tried before	Habitual behavior of an individual,		76.6(casual); 67.5(fine)
								Sufficient portion size	Quantity of food comprising a dish that will satisfy one's appetite		77.8(casual); 78.2(fine)
								Sustainably produced	Core ingredient of the dish is sustainably produced, i.e. being produced utilising sustainable practices		30.9(casual); 37.5(fine)
								Dish that I could not prepare	Individuals’ cooking expertise		84.2(casual); 86.5(fine)
								Avoidance of certain foods	Individual’s perception of potential risks associated with consumption & avoidance of particular menu-items due to personal reasons, such as social or dietetic issues.		32.4(casual); 37.7(fine)
Price et al (2016)	What are we eating? Consumer information requirement within a workplace canteen	Four EU countries (UK, Greece, Denmark and France)	Best-worst scaling	Canteen dish	Workplace canteens	452 employees, (UK (n = 152), Greece (n = 100), Denmark (n = 100) and France (n = 100) who had access to a canteen at their place of work	8	Value for money	The ratio between the perceived quality of the dish and the price paid for it		Value for money, Nutrition, and naturalness were consistently ranked in top three for all coutnries (desite in different orders)	Expert opinion	8	N/a	8	Online survey	Not reported	Sawtooth	Y	Multinomial and conditional logit models	Sawtooth	Yes	Latent class analysis	Y	Attribute selection	Focus group
								Organic	Organic food is produced in a way that respects natural life cycles. It minimises the human impact on the environment and operates as naturally as possible
								Environmental impact	The effect the food production has on the environment
								Naturalness	The extent to which fresh ingredients are used, less use of processed foods containing additives and preservatives
								Nutrition	Nutritional Composition of the food (Fat, Carbohydrates, Protein etc.). Availability of healthy food
								Fair trade	Fair Trade aims to help producers in developing countries to get a fair price for their products so as to reduce poverty, provide the ethical treatment of workers and farmers and promote environmentally friendly and sustainable practices
								Provenance	Where the food was produced/commodities grown
								Animal welfare	How an animal is coping with the conditions in which it lives. An animal is in a good state of welfare if it is healthy, comfortable, well nourished, safe, able to express innate behaviour and if it is not suffering from unpleasant states such as pain, fear and distress
Rusmevichientong et al (2022)	Food Choices and Hypertension Among Rural Thais: Evidence From a Discrete Choice Experiment	Thailand	Discrete choice experiment	Food	5 villages in rural northern Thailand	403 adult residents of 5 villages	4	Food preparation		Buy ready-to-eat food; prpare food at home	2	Literature, expert opinion	4	Y	4	Interview administered	Full factorial	Not reported	Y	Mixed logit model	Not reported	Not reported	Not reported	Y	Attribute/level selection	Other: consultations
								Price		Cheaper price; reasonable price	3
								Taste		Favourite taste; okay taste	4
								Amount of salt		Low; high	1
Saville et al (2021)	Assessing Muslim travellers' preferences regarding food in Japan using conjoint analysis: An exploratory study on the importance of prayer room availability and halalness	Japan	Conjoint analysis	Food in ramen restaurants and shopping malls	Ramen restaurants and shopping malls in Japan	393 Muslims who had travelled to Japan within the last five years	Ramen restaurants: 4. Shopping malls: 3	Ramen restaurants				Literature, expert opinion	5(Ramen), 3(Shopping mall)	N	8	Online survey	Fractional factorial	R	N	Detrended cross-correlation analysis	R	Not clearly reported	Not reported	Y	Attribute selection	Interviews
								Halalness		Halal labelled; Muslim friendly	0.2888
								Prayer room availability		Available; none	0.3105
								Word of mouth		Positive; negative	0.2185
								Price		7; 8; 11; 13 (USD)	0.1822
								Shopping mall
								Halalness		Halal-labelled food available; Muslim-friendly food available	0.3235
								Prayer room availability		Available; none	0.3735
								access		Easy; not	0.303
Szymkowiak et al (2022)	Household Food Waste: The Meaning of Product's Attributes and Food-Related Lifestyle	USA	Choice-based conjoint analysis	Food	Household	753 US residents	4	Convenience		Easy and quick to prepare; difficult to obtain; difficult to prepare	3 clusters with different rankings	Literature	1	N	9	Online survey	Not reported	R	Not reported	Not reported	R	Yes	Subgroup (clustering)	N	N/a	N/a
								Health		Healthy; nutritionally enriched; potentially detrimental
								Taste		Of preferred taste; of neutral taste; of non-preferred taste
								Process		Organically produced; conventionally produced
Thienhirun et al (2018)	Consumer Attitudes and Preferences toward Cross-Cultural Ready-To-Eat (RTE) Food	Thailand and Japan	Conjoint analysis	Thai/Japanese food (ready-to-eat & made-to-order)	Out of home eating	68 people (34 from Thailand; 34 from Japan) that had previous experience of dining Japanese food	4	Taste		Japanese; Thai; mixed (Japanese & Thai)	Importance values: 27.799	Not reported	1	N	9	Interview administered	Fractional factorial	SPSS	N	Pearson's correlation	Not reported	No	N/a	Y	Understanding responses	Interviews
								Design		Clear plastic; letter; colourful picture	24.932
								Calories		Low; medium; high	23.066
								Price		Low; medium; high	24.203
Zhou et al (2022)	How dish components influence older consumers’ evaluation? – A study with application of conjoint analysis and eye tracking technology	Denmark	Conjoint analysis	Dish	Household	Consumers aged 60 years old or above living in Denmark (n=100)	4	Main course		Meatballs; Veggie balls	31%(WTT), 41%(FAM), 32%(HEALTH)	Literature	N/A; asked to rate each card based on willingness to try, familarity, healthiness	N	8	Computer survey administered in a lab setting	Fractional factorial	Not reported	N	Pearson's correlation	Not reported	Not reported	N/a	N	N/a	N/a
								Potatoes		Plain potatoes; Decorated potatoes	12%(WTT), 11%(FAM), 13%(HEALTH)
								Vegetables		Corns; Broccolis; Carrots; Mixed vegetables	43%(WTT), 35%(FAM), 42%(HEALTH)
								Dish label		Without dish label; With dish label	14%(WTT), 13%(FAM), 13%(HEALTH)

## Sheet: Attribute categorization
Category	Subcategory	Author	Original attribute	Associated description	Associated levels
Healthiness (n=27)	Nutritional content (n=8)	Iannuzzi et al (2019)	Protein content		Calculated based on the ingredient list
		Iannuzzi et al (2019)	Carbohydrate content		Calculated based on the ingredient list
		Iannuzzi et al (2019)	Fat content		Calculated based on the ingredient list
		Livingstone et al (2021)	Nutrition content		Low; adequate; optimal
		Livingstone et al (2020)	Nutrition content of a meal		Low; adequate; optimal
		Marchini et al (2023)	Nutrition	Nutritional characteristics of food: amount and type of fat, proteins, vitamins, etc
		Price et al (2016)	Nutrition	Nutritional composition of the food (Fat, Carbohydrates, Protein etc.), availability of healthy food
		Rusmevichientong et al (2022)	Amount of salt		low; high
	Healthy ingredients (n=6)	Chaffee et al (2022)	Fiber source		Grains; vegetables
		Iannuzzi et al (2019)	Additional ingredient (spirulina)		Yes; no
		McKeown et al (2018)	Fruit & vegetables		Poor; Moderate; Good
		McKeown et al (2018)	Carbohydrates		Poor; Moderate; Good
		McKeown et al (2018)	Fat & sugar		Poor; Moderate; Good
		McKeown et al (2018)	Meat & protein		Poor; Moderate; Good
	Healthiness (n=4)	Kamphuis et al (2015)	Healthy		Healthy; neutral; unhealthy
		Kershaw et al (2019)	Healthiness		Neutral; Healthy; Unhealthy
		Peters et al (2020)	Healthy option	Individual’s mindfulness towards selecting a dish containing nutritional properties.
		Szymkowiak et al (2022)	Health		Healthy; nutritionally enriched; potentially detrimental
	Caloric value (n=3)	Arsic et al (2019)	Energy value	Caloric value of a meal
		O'Neill et al (2014)	Calories		Less than 400 calories; Between 400 and 600 calories; Over 600 calories
		Thienhirun et al (2018)	Calories		Low; medium; high
	Quality (n=2)	Corazza et a (2021)	Quality of food		Low-fat yoghurt, chocolate cornflakes, sweet snacks
		Livingstone et al (2021)	Quality		Low; moderate; high
	Satiety (n=2)	Arsic et al (2019)	Digestibility	A subjective feeling in the body after consuming a meal
		Arsic et al (2019)	Elan for work	Mental and physical work after the meal
	Dietary diversity (n=1)	de Guzman et al (2020)	Dietary diversity		2/3/4 food groups
	Safety (n=1)	Marchini et al (2023)	Safety	Extent to which consumption of food is safe and it will not cause illness (e.g. reliability of producers, security of origin)
Price/cost of a meal (n=19)	Objective (n=12)	Buttorff et al (2015)	Price		1.5; 3; 6 nuevos soles (Peruvian currency)
		Jeffries et al (2013)	Price		5; 7.50 USD
		Kamphuis et al (2015)	Price		2; 4; 6; 8 EUR per person
		Kershaw et al (2019)	Price		2; 4; 6; 8 USD per person
		Livingstone et al (2021)	Cost		5; 10; 15 per person
		Livingstone et al (2020)	Cost of a meal		5; 10; 15 per person
		Milte et al (2018)	Additional cost		Amount (open text)
		Nguyen et al (2022)	Price		Casual – restaurants ? Fine Dining – restaurants
					1. $12.99/entrée ? $20.50/entrée
					2. $14.99/entrée ? $28.50/entrée
					3. $17.99/entrée ? $36.50/entrée
					4. $20.99/entrée ? $43.50/entrée
		O'Neill et al (2014)	Cost		£5; £10; £15
		Ong et al (2023)	Price		499 PhP; 599 PhP; 699 PhP (Philipino peso)
		Panchalingam et al (2023)	Price per lunch		$2.80; $3.20; $3.60; $4.00
		Saville et al (2021)	Price		7; 8; 11; 13 (USD)
	Subjective (n=4)	Ernawati et al (2019)	Price		Cheap; average cost; expensive
		Price et al (2016)	Value for money	The ratio between the perceived quality of the dish and the price paid for it
		Rusmevichientong et al (2022)	Price		Cheaper price; reasonable price
		Thienhirun et al (2018)	Price		Low; medium; high
	Non-specified (n=3)	Arsic et al (2019)	Price	Cost of fresh foods
		Marchini et al (2023)	Price	The price paid for food
		Peters et al (2020)	Price	Combination with the type of the dish, the restaurant itself, the atmosphere, the service
Specific meal components and ingredients (n=18)	Specific ingredients (n=11)	Chaffee et al (2022)	Protein source		Chicken; fish; alternative; egg
		Iannuzzi et al (2019)	Flour		00; gluten free; cricket
		Iannuzzi et al (2019)	Mozzarella cheese		Protected Designation of Origin mozzarella cheese
		Iannuzzi et al (2019)	Tomato		Protected Designation of Origin tomato
		McKeown et al (2018)	Dairy		Poor; Moderate; Good
		Nguyen et al (2022)	Fish species		Salmon; Catfish; Cod; Red snapper; Swai/basa/pangasius; Tilapia; Unknown
		Ong et al (2023)	Meat	Main entrée of samgyeopsal	Pork; beef; chicken; seafood
		Ong et al (2023)	Cheese	Cheese can be both a stand-alone dish and an ingredient in cooking.	With cheese; without cheese
		Zhou et al (2022)	Main course		Meatballs; Veggie balls
		Zhou et al (2022)	Potatoes		Plain potatoes; Decorated potatoes
		Zhou et al (2022)	Vegetables		Corns; Broccolis; Carrots; Mixed vegetables
	Specific component (n=7)	Jeffries et al (2013)	Entrée		Grilled chicken sandwich; turkey club sandwich
		Jeffries et al (2013)	Beverage		Diet soda; water
		Jeffries et al (2013)	Side dish		Green salad; fruit (watermelon)
		Kitunen et al (2022)	Main meal; bread; jam biscuit; tuna; jerky bar; chocolate candy; fruit bar; chocolate bar; instant potato; cracker biscuit; fruit in syrup; cereal bar; cheese; muesli; sports drink; noodles; soft candy; hard candy; spreads; soup; chocolate drink
		Loureiro et al (2016)	Single chicken burger; single bacon burger; single beef burger; double beef burger; double bacon burger; double chicken burger; salad
		Ong et al (2023)	Drinks	Drink paired with meal	Soju/beer; soft drinks; juice
		Peters et al (2020)	Accompaniments	e.g. (salade, vegetables, sauce)
Sustainability, environmental and ethical considerations (n=18)	Origin (n=7)	Nguyen et al (2022)	Country of origin		Domestic; Imported; Unknown
		Nguyen et al (2022)	Production method		Wild caught; farm-raised; unknown
		Panchalingam et al (2023)	Entrée		Local or not (2 levels)
		Panchalingam et al (2023)	Fruit		Local or not (2 levels)
		Panchalingam et al (2023)	Vegetable		Local or not (2 levels)
		Peters et al (2020)	Local produce	The origin of the main component of a dish
		Price et al (2016)	Provenance	Where the food was produced/commodities grown
	Environmental and sustainability considerations (n=5)	Marchini et al (2023)	Environmental impact	Effect of food production on the environment (environmental sustainability of the process)
		Nguyen et al (2022)	Sustainability certification		Certificated; non-certified
		Nguyen et al (2022)	Sustainability rating		Green; yellow; red; gray; unknown
		Peters et al (2020)	Sustainably produced	Core ingredient of the dish is sustainably produced, i.e. being produced utilising sustainable practices
		Price et al (2016)	Environmental impact	The effect the food production has on the environment
	Ethical considerations (n=4)	Marchini et al (2023)	Fairness	Limits within which all participants in the value chain receive fair benefits for their work or business (e.g. working conditions, dignified wages)
		Marchini et al (2023)	Legality	The respect of the laws during the production and distribution (e.g. supply chain not controlled by organized crime, animal conditions according to the laws)
		Price et al (2016)	Fair trade	Fair Trade aims to help producers in developing countries to get a fair price for their products so as to reduce poverty, provide the ethical treatment of workers and farmers and promote environmentally friendly and sustainable practices
		Price et al (2016)	Animal welfare	How an animal is coping with the conditions in which it lives. An animal is in a good state of welfare if it is healthy, comfortable, well nourished, safe, able to express innate behaviour and if it is not suffering from unpleasant states such as pain, fear and distress
	Organic production (n=2)	Price et al (2016)	Organic	Organic food is produced in a way that respects natural life cycles. It minimises the human impact on the environment and operates as naturally as possible
		Szymkowiak et al (2022)	Process		Organically produced; conventionally produced
Sensory properties of a meal (n=16)	General taste (n=8)	Kamphuis et al (2015)	Taste		Very good; good; sufficient
		Kershaw et al (2019)	Taste		OK; Good; Very good
		Livingstone et al (2021)	Taste		Sufficient; good; very good
		Livingstone et al (2020)	Taste of a meal		Sufficient; good; very good
		Milte et al (2018)	Taste		Not very (tasty); satisfactory; excellent
		Peters et al (2020)	Combination of ingredients	Combination of ingredients that complement each other well
		Rusmevichientong et al (2022)	Taste		Favourite taste; okay taste
		Szymkowiak et al (2022)	Taste		Of preferred taste; of neutral taste; of non-preferred taste
	Specific taste (n=3)	Chaffee et al (2022)	Spice presence		Spicy; not spicy
		de Guzman et al (2020)	Food		Sweet; salty; sour; umami
		Ernawati et al (2019)	Taste		Sweet; crisp; spicy/hot
	Sensory properties (n=1)	Arsic et al (2019)	Sensory properties	Appearance, smell, taste, texture
	Color (n=1)	de Guzman et al (2020)	Color variation		With color variation; without color variation
	Freshness (n=1)	Ernawati et al (2019)	Freshness		Fresh (fresh from the oven); not fresh
	Texture (n=1)	de Guzman et al (2020)	Food texture		Soft; hard; chewy
	Visual appeal (n=1)	Milte et al (2018)	Visual appeal		Not very (appealing); satisfactory; excellent
Time/convenience (n=14)	Preparation time (n=7)	Arsic et al (2019)	Time needed for preparation	The duration of technological process	Not reported
		Kamphuis et al (2015)	Preparation time		0 minutes (in case of a ready meal, or take-away food); 15 minutes; 30 minutes; 45 minutes
		Kershaw et al (2019)	Preparation time		0; 15; 30; 45 minutes
		Livingstone et al (2021)	Preparation time		5; 15; 30 minutes
		Livingstone et al (2020)	Preparation time of a meal		5; 15; 30 minutes
		O'Neill et al (2014)	Cooking time		Less than 30 min; Between 31 and 60 min; Over 60 min
		Rusmevichientong et al (2022)	Food preparation		Buy ready-to-eat food; prpare food at home
	Flexibility (n=3)	Milte et al (2018)	Flexibility in mealtimes		Anytime I like; within a 1-2 hour range; at a set time
		Milte et al (2018)	Degree of choice in serving size		No choice; a little; a lot of choice
		Milte et al (2018)	Degree of choice in meal provided		No choice; the day before; at the time of serving
	Convenience/access (n=2)	Saville et al (2021)	Access		Easy; not
		Szymkowiak et al (2022)	Convenience		Easy and quick to prepare; difficult to obtain; difficult to prepare
	Travel time (n=2)	Kamphuis et al (2015)	Travel time from home to shop		5 minutes; 10 minutes; 15 minutes; 20 minutes
		Kershaw et al (2019)	Travel time from home to the food store		5; 10; 20; 30 minutes
Marketing and presentation (n=10)	Label/packaging (n=7)	Corazza et a (2021)	Packaging		Natural; bright and colorful
		Corazza et a (2021)	Claim		Healthy; multivit; tasty
		Jeffries et al (2013)	Label		Fresh leaf logo; Healthy!
		Saville et al (2021)	Halalness		Halal labelled; Muslim friendly
		Saville et al (2021)	Halalness		Halal-labelled food available; Muslim-friendly food available
		Thienhirun et al (2018)	Design		Clear plastic; letter; colourful picture
		Zhou et al (2022)	Dish label		Without dish label; With dish label
	Brand (n=1)	Ong et al (2023)	Brand		Sariwon Korea; Soban K-Town Grill; Samgyupsalamat; Romantic Baboy
	Informal marketing (n=1)	Saville et al (2021)	Word of mouth		Positive; negative
	Menu description (n=1)	Peters et al (2020)	Way a dish is written in menu
Portion size (n=7)		Buttorff et al (2015)	Salad		None, medium, large
		Buttorff et al (2015)	Soup		None, medium, large
		Buttorff et al (2015)	Sides (beans and rice)		Small, medium, large
		Buttorff et al (2015)	Meat		None, one portion, two portions
		Buttorff et al (2015)	Fruit		None, one fruit, two fruits
		de Guzman et al (2020)	Portion size		Small portion size, big portion size
		Peters et al (2020)	Sufficient portion size	Quantity of food comprising a dish that will satisfy one's appetite
Familiarity (n=5)		Livingstone et al (2020)	Familiarity of a meal		Not very familiar; somewhat familiar; very familiar
		Peters et al (2020)	Dish I’ve never tried before	Variety-seeking behavior of an individual
		Peters et al (2020)	Dish that I have tried before	Habitual behavior of an individual,
		Peters et al (2020)	Dish that I could not prepare	Individuals’ cooking expertise
		Peters et al (2020)	Avoidance of certain foods	Individual’s perception of potential risks associated with consumption & avoidance of particular menu-items due to personal reasons, such as social or dietetic issues.
Meal preparation (n=5)		Arsic et al (2019)	Technical, technological, and organizational requirements for storage of meal components	Space, appliances, and storage facilities
		Arsic et al (2019)	Technical, technological and organizational requirements for meal preparation	Space, machines, appliances, accessories, recipes, qualifications of people
		Arsic et al (2019)	The possibility of preparation in unforeseen circumstances	In case of technical, technological and organizational requirements dysfunction
		Ong et al (2023)	Style	Style refers to the way the main entrée is being prepared.	Grilled; Hot Pot; Pre-cooked
		Peters et al (2020)	Method of preparation	How a dish is cooked and served on the plate (i.e. grilled, steamed, battered, etc.)
Taste theme (n=4)		Chaffee et al (2022)	Taste theme		Meditteranean; Asian; Latin
		Ernawati et al (2019)	Food's origin		Indonesian; Western; Chinese; Japanese
		O'Neill et al (2014)	Food type	“Food type” was used as a proxy for taste	Asian; Italian; Local
		Thienhirun et al (2018)	Taste		Japanese; Thai; mixed (Japanese & Thai)
Characteristics of the dining environment (n=3)		Ernawati et al (2019)	How food is served		With wait-staff; self-service
